# Supplementary material
Source: PubMed Central journal article supplement (PMC7272260)
Supplement: NIHMS1589474-supplement-1.pdf [file NIHMS1589474-supplement-1.pdf]

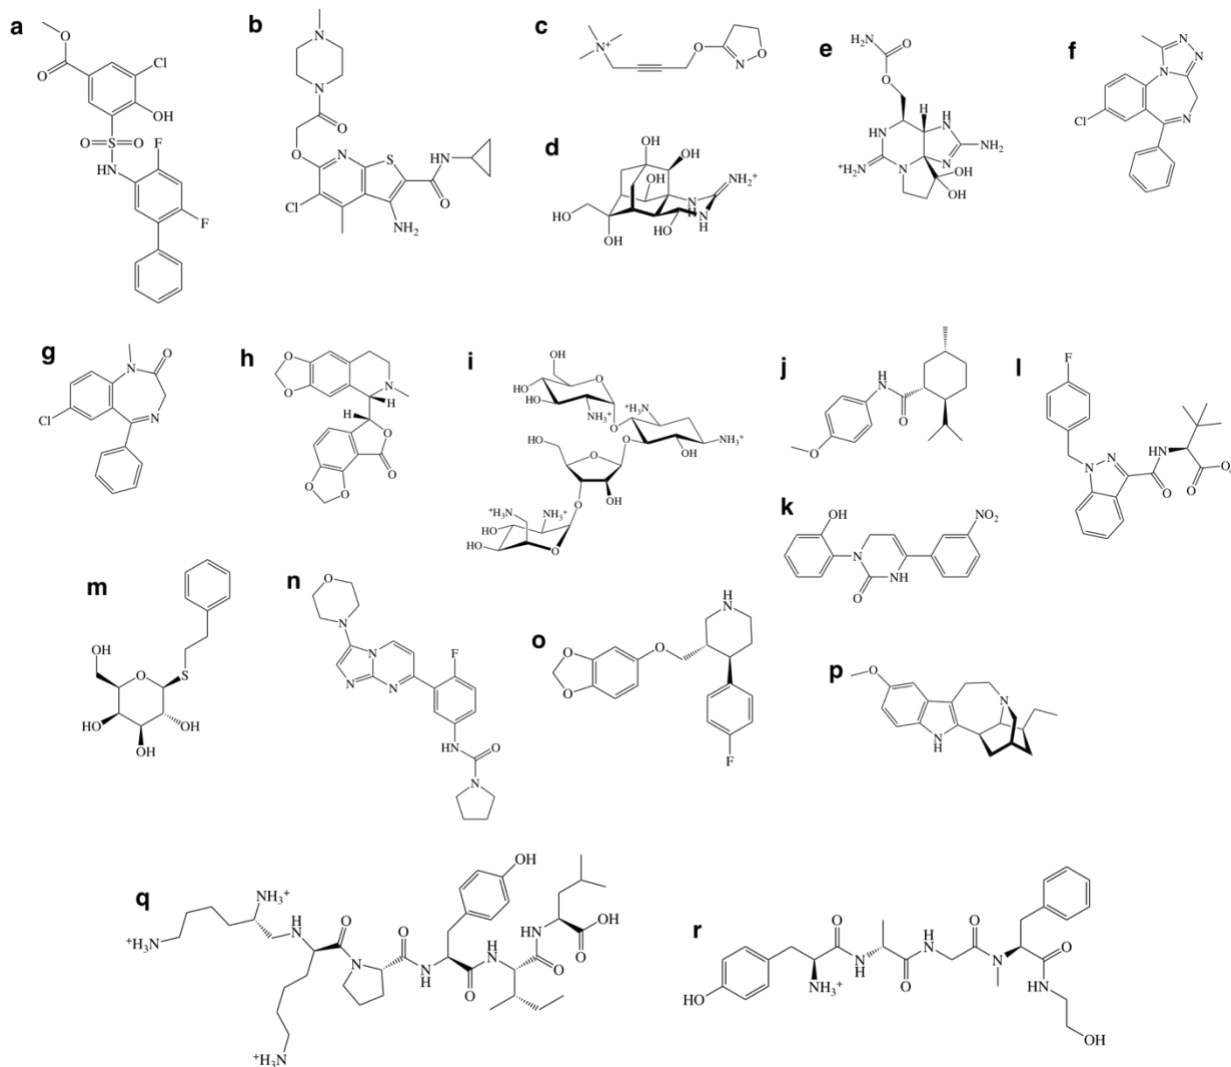

**Figure S1: Ligands docked in this work; related to Figures 2, 3, 4, 5, 6, and 8.**

**a**, NDI-091143/ATP citrate lyase. **b**, LY2119620/M2 receptor. **c**, Iperoxo/M2 receptor. **d**, Tetrodotoxin/NaVaPas. **e**, Saxitoxin/NaV1.7. **f**, Xanax/GABA<sub>A</sub>. **g**, Valium/GABA<sub>A</sub>. **h**, Biculine/GABA<sub>A</sub>. **i**, Paromomycin/*leishmania* ribosome. **j**, Menthol analogue WS-12/TRPM8. **k**, Icilin/TRPM8. **l**, Fubinaca/cannabinoid type 1 receptor. **m**, PETG/beta-galactosidase. **n**, GSK3494245/*leishmania* 20S proteasome. **o**, Paroxetine/serotonin transporter. **p**, Ibogaine/serotonin transporter. **q**, DAMGO/ $\mu$ -opioid receptor. **r**, JMV449/neurotensin type 1 receptor.

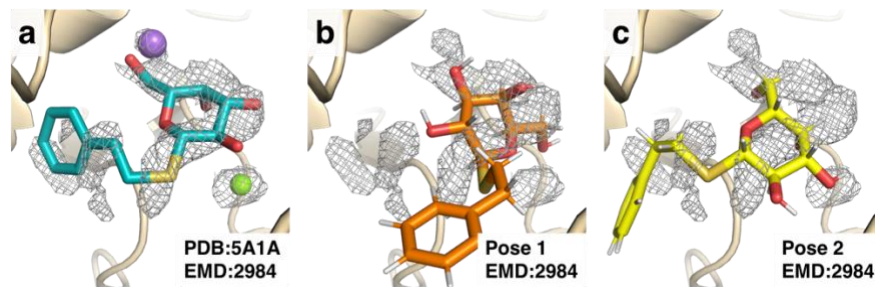

**Figure S2: PETG poses docked without EM map densities; related to Figure 2.**

**a**, Deposited structure PDB:5A1A PETG bound to beta-galactosidase, with displayed density from EMD:2984 ( $\sigma=2.0$ ). The purple and green sphere correspond to a sodium and magnesium ion, respectively. **b**, Top pose for PETG from docking to PDB:5A1A without using the EM density, overlaid with EMD:2984 ( $\sigma=2.0$ ). **c**, Another pose from docking to PDB:5A1A without density, overlaid with EMD:2984 ( $\sigma=2.0$ ).

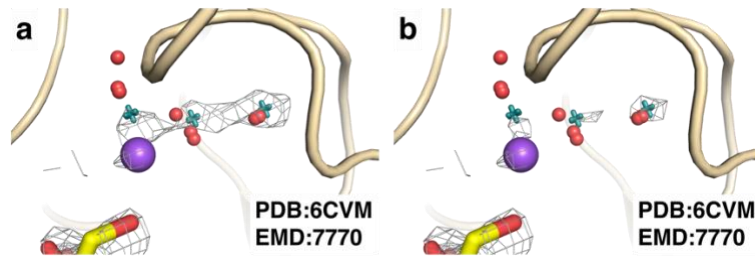

**Figure S3: Additional beta-galactosidase hydration sites predicted by JAWS, related to**

**Figure 2, 3, and 4**

Predicted sites of hydration from triplicate JAWS simulations on beta-galactosidase are represented as red spheres, while locations of real-space refined waters are represented as teal crosses. The purple sphere corresponds to a sodium ion. **a, b**, Show density for EMD:7770 at two different contour levels ( $\sigma=1.5$ ,  $2.0$  respectively).

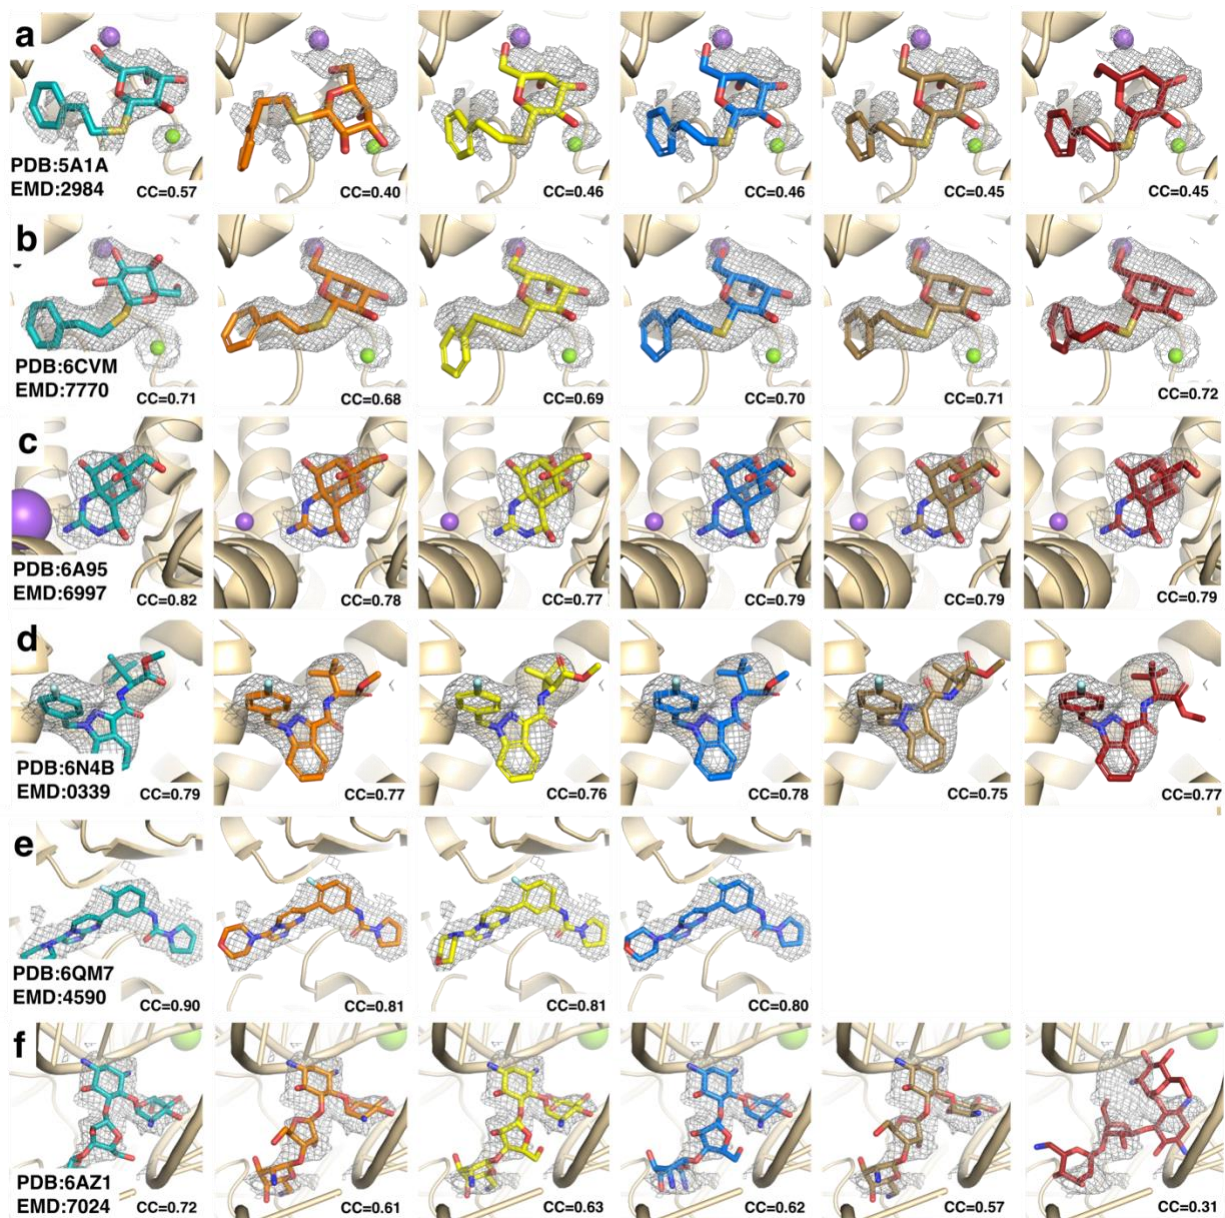

**Figure S4: Sub-3.0 Å cryoEM maps from this work, related to Figure 4, 5**

In all cases the deposited pose in the PDB is in teal while the orange, yellow, blue, brown, and red poses in the same row correspond to pose 1-5, respectively, in supplementary table 2. CC is the real space cross-correlation calculated without hydrogen atoms. **a**, PETG/beta-galactosidase (PDB:5A1A, EMD:2984 ( $\sigma=2.0$ )). **b**, PETG/beta-galactosidase (PDB:6CVM, EMD:7770 ( $\sigma=3.0$ )). **c**, Tetrodotoxin/NavPaS (PDB:6A95, EMD:6995 ( $\sigma=11.0$ )). **d**, Fubina/cannabinoid type 1 receptor (PDB:6N4B, EMD:0339 ( $\sigma=3.0$ )). **e**, GSK 3494245/*leishmania* 20S proteasome (PDB:6QM7, EMD:4590 ( $\sigma=3.0$ )). **f**, Paromomycin/*leishmania* ribosome (PDB:6AZ1, EMD:7024 ( $\sigma=1.0$ )).

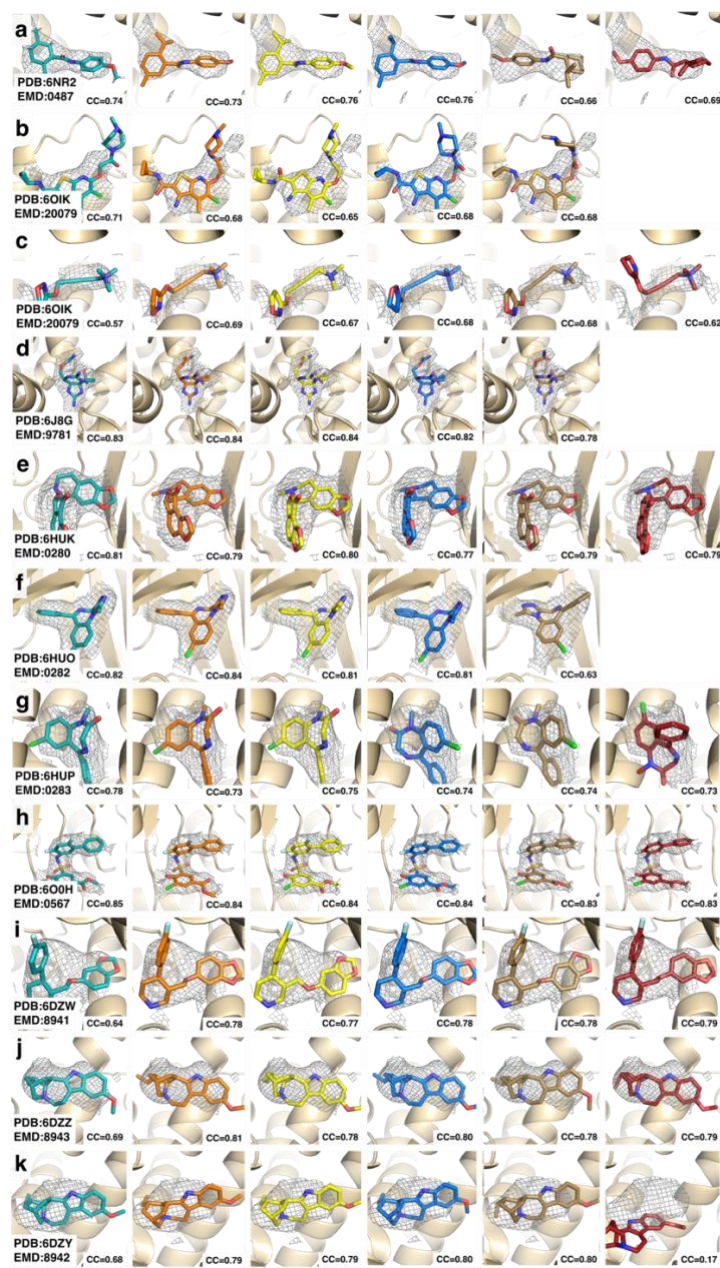

**Figure S5: 3.0 Å - 4.5 Å maps from this work, related to Figure 6.**

In all cases the deposited pose in the PDB is in teal while the orange, yellow, blue, brown, and red poses in the same row correspond to pose 1-5, respectively, in supplementary table 2. CC is the real space cross-correlation calculated without hydrogen atoms. **a**, Menthol analogue WS-12/TRPM8 (PDB:6NR2, EMD:0487 ( $\sigma=3.0$ )). **b**, LY2119620/M2R (PDB:6OIK, EMD:20079 ( $\sigma=7.0$ )). **c**, Iperoxo/M2R (PDB:6OIK, EMD:20079 ( $\sigma=3.0$ )). **d**, Saxitoxin/Nav1.7 (PDB: 6J8G, EMD:9781 ( $\sigma=3.0$ )). **e**, Biculine/GABA<sub>A</sub> (PDB:6HUK, EMD:0280 ( $\sigma=5.0$ )). **f**, Xanax/GABA<sub>A</sub> (PDB:6HUO, EMD:0282 ( $\sigma=3.0$ )). **g**, Valium, GABA<sub>A</sub> (PDB:6HUP, EMD:0283 ( $\sigma=5.0$ )). **h**, NDI-091143/ATP Citrate Lyase (PDB:6O0H, EMD:0567 ( $\sigma=3.5$ )). **i**, Paroxetine/serotonin transporter (PDB:6DZW, EMD:8941 ( $\sigma=3.0$ )). **j**, Ibogaine/serotonin transporter (PDB:6DZZ, EMD:8943 ( $\sigma=1.4$ )). **k**, Ibogaine, serotonin transporter (PDB:6DZY, EMD:8942 ( $\sigma=4.0$ )).

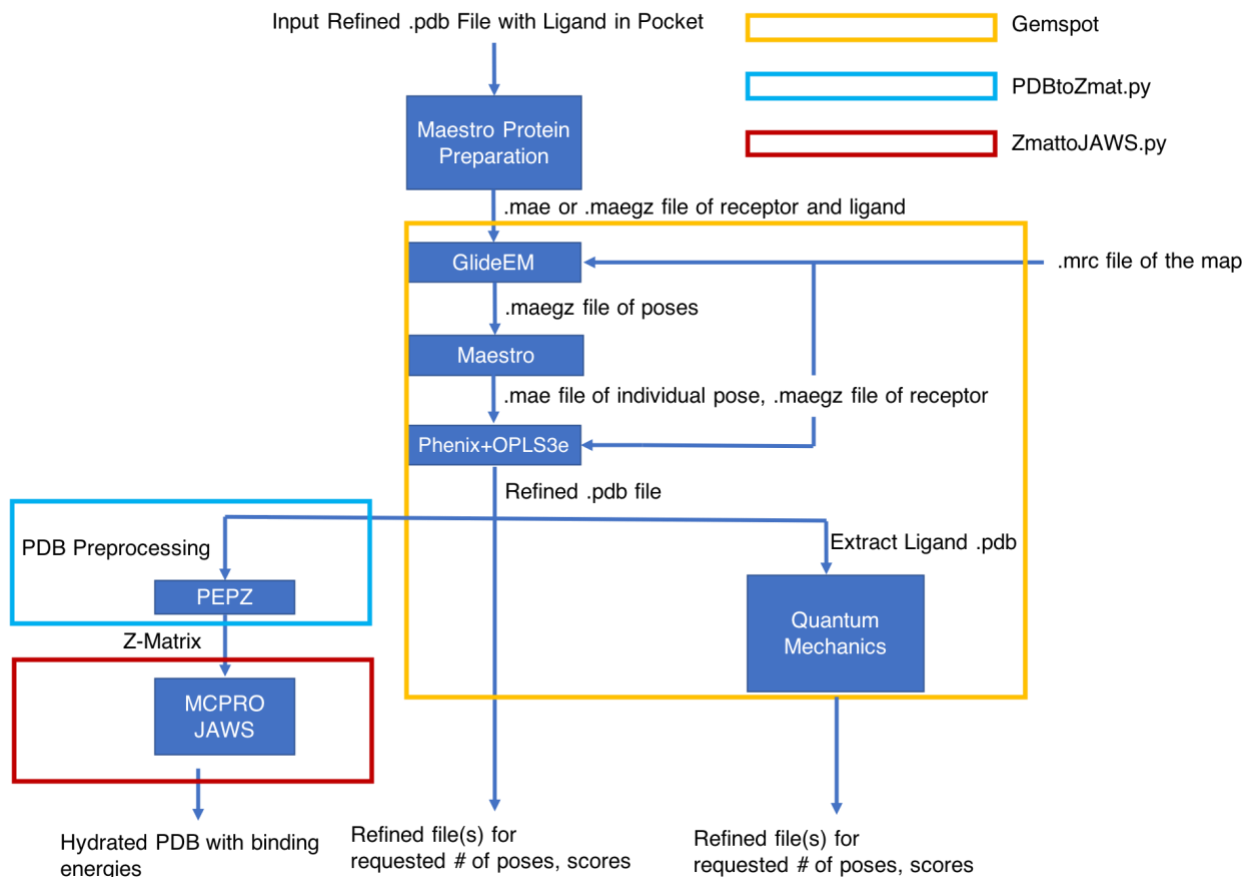

**Figure S6: GemSpot Usage Diagram, related to Figure 1.** Commands to call the various scripts are as follows:

Gemspot pipeline:

```
$SCHRODINGER/run glideEM20-1.py AAA.mae -ligand_asl "res.ptype BBB" -map CCC.mrc -mode exhaustive -docking_option FACEDEN=1 -docking_option FACRF=1 -docking_option POSES_PER_LIG=5 -phenix_opls3e_refine only_ligands -calc_jaguar_pose_energy -NOJOBID -resolution DDD -jaguar_restraint_strength -write_local_region -write_region_distance_cutoff 24 -write_region_min_molecule_size 50 -DEBUG -SAVE
```

Where AAA is the name of the system file, BBB the unique residue name, CCC the map name, and DDD the resolution of the map.

GlideEM:

```
$SCHRODINGER/run redock_with_emden.py AAA.mae -ligand_asl "res.ptype " -map CCC.mrc -SAVE -JOBNAME 6o72dock3 -faceden 1 -facrf 1
```

Where AAA is the name of the system file, BBB the unique residue name, and CCC the map name

PHENIX/OPLS3e:

```
$SCHRODINGER/run run_phenix_real_space_refine.py AAA.mae -receptor EEE.maegz -map CCC.mrc -force_field_region "res.ptype CCC" -JOBNAME 6o6rtest -resolution DDD -NOJOBID -phenix_refine_option output.model_format=pdb
```

Where AAA is the name of the ligand file, BBB the unique residue name, CCC the map name, DDD the resolution of the map, and EEE the name of the receptor file.

**Table S1**

All systems studied in this work, sorted by resolution, related to Figures 2, 3, 4, 5, 6, 7, and 8.

| Name                                 | PDB Code | Resolution | Biomolecule      | Ligand                               |
|--------------------------------------|----------|------------|------------------|--------------------------------------|
| Beta-Galactosidase                   | 6CVM     | 1.9        | Protein          | Phenethyl $\beta$ -d-thiogalactoside |
| Beta-Galactosidase                   | 5A1A     | 2.2        | Protein          | Phenethyl $\beta$ -d-thiogalactoside |
| NavPaS                               | 6A95     | 2.6        | Membrane Protein | Tetrodotoxin                         |
| Leishmania Ribosome<br>Small Subunit | 6AZ1     | 2.7        | RNA/Protein      | Paromomycin                          |
| Leishmania 20S Proteasome            | 6QM7     | 2.8        | Protein          | GSK3494245                           |
| Cannabinoid Receptor 1               | 6N4B     | 3.0        | Membrane Protein | Fubinaca                             |
| Nav1.7                               | 6J8G     | 3.2        | Membrane Protein | Saxitoxin                            |
| GABA <sub>A</sub> Receptor           | 6HUO     | 3.26       | Membrane Protein | Xanax                                |
| TRPM8                                | 6NR3     | 3.4        | Membrane Protein | Icilin                               |
| Mu Opioid Receptor                   | 6DDF     | 3.5        | Membrane Protein | DAMGO                                |
| GABA <sub>A</sub> Receptor           | 6HUP     | 3.58       | Membrane Protein | Valium                               |
| Muscarinic Receptor 2                | 6OIK     | 3.6        | Membrane Protein | Iperoxo                              |
| Muscarinic Receptor 2                | 6OIK     | 3.6        | Membrane Protein | LY2119620                            |
| Serotonin Transporter                | 6DZZ     | 3.6        | Membrane Protein | Ibogaine                             |
| ATP Citrate Lyase                    | 6O0H     | 3.67       | Protein          | NDI-091143                           |
| GABA <sub>A</sub> Receptor           | 6HUK     | 3.69       | Membrane Protein | Biculine                             |
| TRPM8                                | 6NR2     | 4.0        | Membrane Protein | Menthol Analogue WS-12               |
| Serotonin Transporter                | 6DZY     | 4.1        | Membrane Protein | Ibogaine                             |
| Serotonin Transporter                | 6DZW     | 4.3        | Membrane Protein | Paroxetine                           |

**Table S2**

Docking and refinement results for the systems studied in this work, related to Figures 2, 3, 4, 5, 6, 7, and 8.

| System                 | Pose | CC   | Deposited Pose CC | Glide Density Score | Glide Docking Score | QM Pose Strain | GlideEM CPU Time (Minutes: Seconds) | OPLS3e/Phenix Refinement Time (Minutes: Seconds) | Pipeline CPU Time (Hours: Minutes: Seconds) | Traditional Glide CPU Time (Minutes: Seconds) | Traditional Post-Refinement CC |
|------------------------|------|------|-------------------|---------------------|---------------------|----------------|-------------------------------------|--------------------------------------------------|---------------------------------------------|-----------------------------------------------|--------------------------------|
|                        |      |      |                   |                     |                     |                |                                     |                                                  |                                             |                                               |                                |
| Bgal                   | 1    | 0.40 | 0.57              | -3.4                | -5.8                | 5.7            | 25:45                               | 32:41                                            | 32:36:41                                    | 24:46                                         | 0.32                           |
| PETG                   | 2    | 0.46 |                   | -3.7                | -5.4                | 2.5            |                                     | 34:21                                            |                                             |                                               | 0.32                           |
| 5A1A                   | 3    | 0.46 |                   | -3.6                | -5.3                | 2.7            |                                     | 34:04                                            |                                             |                                               | 0.49                           |
|                        | 4    | 0.45 |                   | -3.8                | -5.1                | 2.3            |                                     | 34:12                                            |                                             |                                               | 0.50                           |
|                        | 5    | 0.45 |                   | -3.7                | -5.3                | 0.0            |                                     | 35:09                                            |                                             |                                               | 0.50                           |
| Bgal                   | 1    | 0.68 | 0.71              | -6.5                | -8.0                | 1.0            | 25:43                               | 34:43                                            | 30:28:09                                    | 27:55                                         | 0.75                           |
| PETG                   | 2    | 0.69 |                   | -7.3                | -7.6                | 0.6            |                                     | 34:29                                            |                                             |                                               | 0.75                           |
| 6CVM                   | 3    | 0.70 |                   | -7.7                | -7.2                | 0.5            |                                     | 34:47                                            |                                             |                                               | 0.73                           |
|                        | 4    | 0.71 |                   | -7.8                | -7.4                | 0.6            |                                     | 34:55                                            |                                             |                                               | 0.59                           |
|                        | 5    | 0.72 |                   | -6.9                | -7.5                | 0.0            |                                     | 35:05                                            |                                             |                                               |                                |
| NavPaS                 | 1    | 0.78 | 0.82              | -2.8                | -5.2                | 5.6            | 05:01                               | 29:28                                            | 17:06:59                                    | 03:23                                         | 0.77                           |
| Tetrodotoxin           | 2    | 0.77 |                   | -2.8                | -5.3                | 4.4            |                                     | 29:45                                            |                                             |                                               | 0.77                           |
| 6A95                   | 3    | 0.79 |                   | -2.8                | -5.4                | 0.0            |                                     | 30:40                                            |                                             |                                               | 0.76                           |
|                        | 4    | 0.79 |                   | -2.8                | -5.2                | 0.0            |                                     | 30:37                                            |                                             |                                               | 0.78                           |
|                        | 5    | 0.79 |                   | -2.8                | -5.0                | 0.8            |                                     | 29:35                                            |                                             |                                               | 0.74                           |
| TRPM8                  | 1    | 0.74 | 0.74              | -0.69               | -5.35               | 1.6            | 01:42                               | 58:29                                            | 13:04:48                                    | 01:10                                         | 0.55                           |
| Menthol Analogue WS-12 | 2    | 0.68 |                   | -0.62               | -4.93               | 0.9            |                                     | 53:12                                            |                                             |                                               | 0.73                           |
| 6NR2                   | 3    | 0.73 |                   | -0.92               | -3.7                | 0.0            |                                     | 48:49                                            |                                             |                                               | 0.72                           |
|                        | 4    | 0.66 |                   | -0.76               | -4.7                | 0.1            |                                     | 49:43                                            |                                             |                                               | 0.71                           |
|                        | 5    | 0.70 |                   | -0.67               | -4.2                | 1.3            |                                     | 49:11                                            |                                             |                                               | 0.71                           |
| TRPM8                  | 1    | 0.75 | 0.67              | -1.9                | -6.4                | 0.0            | 01:36                               | 49:22                                            | 07:04:08                                    | 01:05                                         | 0.75                           |
| Icilin                 | 2    | 0.79 |                   | -2.4                | -5.7                | 2.2            |                                     | 52:08                                            |                                             |                                               | 0.75                           |
| 6NR3                   | 3    | 0.79 |                   | -2.3                | -6.4                | 1.0            |                                     | 50:34                                            |                                             |                                               | 0.78                           |
|                        | 4    | 0.78 |                   | -2.0                | -6.3                |                |                                     | 48:51                                            |                                             |                                               | 0.77                           |
|                        | 5    | 0.81 |                   | -1.8                | -6.5                |                |                                     | 55:04                                            |                                             |                                               | 0.78                           |
| Cannabinoid Receptor 1 | 1    | 0.77 | 0.79              | -10.0               | -9.5                | 0.0            | 02:47                               | 21:22                                            | 14:40:00                                    | 01:55                                         | 0.74                           |
| Fubinaca               | 2    | 0.76 |                   | -9.4                | -9.2                | 0.1            |                                     | 23:55                                            |                                             |                                               | 0.75                           |
| 6N4B                   | 3    | 0.78 |                   | -9.5                | -9.6                | 0.0            |                                     | 25:19                                            |                                             |                                               | 0.74                           |
|                        | 4    | 0.75 |                   | -9.9                | -9.6                | 6.8            |                                     | 21:08                                            |                                             |                                               | 0.74                           |
|                        | 5    | 0.77 |                   | -9.2                | -9.2                |                |                                     | 19:19                                            |                                             |                                               |                                |
| GABA(A)                | 1    | 0.80 | 0.82              | -3.4                | -7.4                | 0.0            | 06:39                               | 17:07                                            |                                             | 05:10                                         | 0.80                           |
| Xanax                  | 2    | 0.74 |                   | -4.0                | -8.3                | 0.0            |                                     | 17:00                                            |                                             |                                               | 0.70                           |
| 6HUO                   |      |      |                   |                     |                     |                |                                     |                                                  |                                             |                                               | 0.76                           |
| GABA(A)                | 1    | 0.77 | 0.81              | -4.8                | -6.7                | 0.0            | 06:44                               | 16:42                                            |                                             | 05:32                                         | 0.77                           |
| Biculine               | 2    | 0.80 |                   | -5.6                | -8.0                | 0.1            |                                     | 16:20                                            |                                             |                                               | 0.73                           |
| 6HUK                   | 3    | 0.75 |                   | -5.2                | -8.5                | 0.1            |                                     | 16:36                                            |                                             |                                               | 0.76                           |
| GABA(A)                | 1    | 0.76 | 0.78              | -2.2                | -8.5                |                | 06:41                               | 16:11                                            | 09:47:32                                    | 05:26                                         | 0.75                           |
| Valium                 | 2    | 0.75 |                   | -2.3                | -7.2                |                |                                     | 16:15                                            |                                             |                                               | 0.75                           |



|                           |   |      |      |       |        |     |       |       |          |       |      |
|---------------------------|---|------|------|-------|--------|-----|-------|-------|----------|-------|------|
| 6HUP                      | 3 | 0.77 |      | -2.3  | -6.5   |     |       | 16:18 |          |       | 0.67 |
|                           | 4 | 0.74 |      | -1.6  | -7.5   |     |       | 16:31 |          |       | 0.73 |
|                           | 5 | 0.76 |      | -2.3  | -7.0   |     |       | 16:22 |          |       | 0.75 |
| Muscarinic Receptor 2     | 1 | 0.67 | 0.71 | -11.0 | -7.3   | 0.0 | 02:55 | 11:54 |          | 02:10 | 0.65 |
| LY2119620                 | 2 | 0.62 |      | -11.4 | -7.1   | 3.7 |       | 11:58 |          |       | 0.62 |
| 6OIK                      | 3 | 0.61 |      | -11.0 | -8.5   | 3.8 |       | 12:16 |          |       | 0.65 |
|                           | 4 | 0.69 |      | -11.3 | -8.1   | 0.6 |       | 12:00 |          |       |      |
|                           | 5 | 0.67 |      | -11.0 | -7.3   | 3.6 |       |       |          |       |      |
| Muscarinic Receptor 2     | 1 | 0.76 | 0.57 | -0.7  | -8.4   | 3.0 | 02:32 | 15:09 |          | 02:01 | 0.71 |
| Iperoxo                   | 2 | 0.72 |      | -0.5  | -8.2   |     |       | 15:28 |          |       | 0.70 |
| 6OIK                      | 3 | 0.74 |      | -0.6  | -8.0   |     |       | 15:38 |          |       | 0.72 |
|                           | 4 | 0.73 |      | -0.74 | -7.8   | 2.7 |       | 15:35 |          |       | 0.71 |
|                           | 5 | 0.70 |      | -0.72 | -8.0   | 0.0 |       | 12:06 |          |       | 0.74 |
| ATP-Citrate Lyase         | 1 | 0.85 | 0.85 | -9.3  | -665.7 |     | 23:04 | 25:06 |          | 22:03 | 0.85 |
| NDI-091143                | 2 | 0.84 |      | -8.8  | -643.4 |     |       | 26:45 |          |       | 0.85 |
| 6O0H                      | 3 | 0.84 |      | -8.7  | -680.7 |     |       | 24:41 |          |       | 0.82 |
|                           |   |      |      |       |        |     |       |       |          |       | 0.82 |
| Nav1.7                    | 1 | 0.80 | 0.83 | -2.1  | -7.8   | 0.0 | 4:50  | 21:38 | 09:33:47 | 03:41 | 0.67 |
| Saxitoxin                 | 2 | 0.81 |      | -2.7  | -7.1   | 1.2 |       | 21:56 |          |       | 0.82 |
| 6J8G                      | 3 | 0.81 |      | -2.5  | -6.5   | 1.9 |       | 21:37 |          |       | 0.67 |
|                           |   |      |      |       |        |     |       |       |          |       | 0.65 |
| Leishmania 20S Proteasome | 1 | 0.81 | 0.90 | -3.2  | -7.2   | 0.0 | 70:55 | 59:41 |          | 67:45 | 0.80 |
| GSK3494245                | 2 | 0.81 |      | -3.2  | -6.9   | 1.5 |       | 59:10 |          |       | 0.80 |
| 6QM7                      | 3 | 0.80 |      | -3.3  | -7.1   | 1.6 |       | 59:06 |          |       | 0.76 |
|                           |   |      |      |       |        |     |       |       |          |       | 0.51 |
|                           |   |      |      |       |        |     |       |       |          |       | 0.72 |
| Serotonin Transporter     | 1 | 0.79 | 0.64 | -2.3  | -7.7   | 1.0 | 02:50 | 25:28 |          | 01:53 | 0.77 |
| Paroxetine                | 2 | 0.76 |      | -2.5  | -8.0   | 0.0 |       | 24:02 |          |       | 0.77 |
| 6DZW                      | 3 | 0.79 |      | -2.3  | -7.5   | 1.1 |       | 23:52 |          |       | 0.78 |
|                           | 4 | 0.77 |      | -2.1  | -7.8   | 0.8 |       | 24:17 |          |       | 0.79 |
|                           |   |      |      |       |        |     |       |       |          |       | 0.52 |
| Serotonin Transporter     | 1 | 0.77 | 0.68 | -4.5  | -7.8   | 0.0 | 02:35 | 23:53 |          | 01:43 | 0.76 |
| Ibogaïne                  | 2 | 0.76 |      | -4.4  | -8.1   | 0.8 |       | 27:50 |          |       | 0.77 |
| 6DZY                      | 3 | 0.77 |      | -4.4  | -8.1   | 3.2 |       | 22:19 |          |       | 0.78 |
|                           | 4 | 0.78 |      | -4.1  | -8.1   | 0.0 |       | 27:54 |          |       | 0.74 |
|                           |   |      |      |       |        |     |       |       |          |       |      |
| Serotonin Transporter     | 1 | 0.74 | 0.69 | -10.1 | -7.5   | 0.7 | 02:39 | 22:15 |          | 01:26 | 0.77 |
| Ibogaïne                  | 2 | 0.75 |      | -10.0 | -7.1   | 0.6 |       | 22:36 |          |       | 0.77 |
| 6DZZ                      | 3 | 0.74 |      | -9.5  | -5.9   | 0.0 |       | 22:12 |          |       | 0.53 |
|                           | 4 | 0.75 |      | -9.9  | -6.8   | 0.9 |       | 22:15 |          |       | 0.55 |
|                           |   |      |      |       |        |     |       |       |          |       | 0.54 |
| Leishmania Ribosome       | 1 | 0.70 | 0.72 | -5.8  | -40645 |     | 10:20 | 33:25 |          | 04:56 | 0.44 |
| Paromomycin               | 2 | 0.68 |      | -5.4  | -40687 |     |       | 37:03 |          |       | 0.64 |
| 6AZ1                      | 3 | 0.65 |      | -5.4  | -41242 |     |       | 33:58 |          |       | 0.48 |
|                           | 4 | 0.66 |      | -4.7  | -41279 |     |       | 33:32 |          |       | 0.41 |
|                           | 5 | 0.39 |      | -4.3  | -41017 |     |       | 33:28 |          |       | 0.47 |

|                      |   |      |      |        |          |       |  |  |
|----------------------|---|------|------|--------|----------|-------|--|--|
| Leishmania Ribosome  | 1 | 0.74 | -5.8 | -52301 | 10:29    | 39:18 |  |  |
| Paromomycin          | 2 | 0.77 | -5.5 | -51518 |          | 36:13 |  |  |
| 15k particles        | 3 | 0.76 | -4.2 | -52797 |          | 40:26 |  |  |
|                      | 4 | 0.77 | -0.8 | -52075 |          | 35:31 |  |  |
|                      | 5 | 0.76 | 0.9  | -51741 |          | 39:37 |  |  |
| Leishmania Ribosome  | 1 | 0.80 | -6.4 | -52255 | 10:27    | 38:33 |  |  |
| Paromomycin          | 2 | 0.79 | -5.7 | -51587 |          | 38:50 |  |  |
| 5k particles         | 3 | 0.81 | -5.6 | -51189 |          | 36:01 |  |  |
|                      | 4 | 0.80 | -5.7 | -51376 |          | 36:38 |  |  |
|                      | 5 | 0.82 | -1.3 | -52117 |          | 38:47 |  |  |
| Leishmania Ribosome  | 1 | 0.89 | -5.6 | -43357 | 10:03    | 33:48 |  |  |
| Paromomycin          | 2 | 0.89 | -4.5 | -46328 |          | 36:48 |  |  |
| 2.5k particles       | 3 | 0.89 | -2.4 | -46599 |          | 37:55 |  |  |
|                      | 4 | 0.89 | 2.2  | -43985 |          | 37:48 |  |  |
|                      | 5 | 0.89 | 2.9  | -43743 |          | 37:55 |  |  |
| Mu Opioid Receptor   |   |      |      |        |          |       |  |  |
| DAMGO                | 1 | 0.67 | -5.5 | -73.1  | 54:22:33 | 14:44 |  |  |
| 6DDE                 | 2 | 0.66 | -5.5 | -84.3  |          | 15:05 |  |  |
|                      | 3 | 0.63 | -5.7 | -95.2  |          | 14:36 |  |  |
|                      | 4 | 0.61 | -5.7 | -88.4  |          | 15:26 |  |  |
|                      | 5 | 0.59 | -5.5 | -74.8  |          | 14:01 |  |  |
|                      | 6 | 0.58 | -5.5 | -69.9  |          | 14:36 |  |  |
|                      | 7 | 0.57 | -5.4 | -82.4  |          | 14:57 |  |  |
|                      | 8 | 0.55 | -5.5 | -82.4  |          | 14:17 |  |  |
| Neurotensin Receptor |   |      |      |        |          |       |  |  |
| JMV449               | 1 | 0.69 | -8.2 | -10.7  | 37:20:52 | 21:57 |  |  |
| 6OS9                 | 2 | 0.69 | -8.0 | -12.6  |          | 21:33 |  |  |
|                      | 3 | 0.69 | -8.7 | -12.2  |          | 20:44 |  |  |
|                      | 4 | 0.69 | -7.7 | -10.5  |          | 20:22 |  |  |
|                      | 5 | 0.68 | -7.9 | -7.4   |          | 20:24 |  |  |
|                      | 6 | 0.68 | -8.2 | -9.0   |          | 21:10 |  |  |
|                      | 7 | 0.68 | -8.0 | -10.0  |          | 21:31 |  |  |

Glide and Emodel correspond to the Glide score and Emodel described in the methods section. CC is the cross correlation between the ligand model and the map. Timing information represents the cpu time on a single core of an Intel Core i7-8700 @ 3.2 GHz.
